# Supplementary material for: Association of Bempedoic Acid Administration With Atherogenic Lipid Levels in Phase 3 Randomized Clinical Trials of Patients With Hypercholesterolemia
Source: PubMed Central journal article supplement — JAMA Cardiol. 2020 Jul 1;5(10):1–12. doi: 10.1001/jamacardio.2020.2314 (PMC7330832; doi:10.1001/jamacardio.2020.2314), 2020-07-01
Supplement: jamacardiol-e202314-s001.pdf [file jamacardiol-e202314-s001.pdf]

## Supplementary Online Content

Banach M, Duell PB, Gotto AM Jr, et al. Association of bempedoic acid administration with atherogenic lipid levels in phase 3 randomized clinical trials of patients with hypercholesterolemia. *JAMA Cardiol*. Published online July 1, 2020. doi:10.1001/jamacardio.2020.2314

**eTable 1.** Randomized, Double-blind, Parallel-Group, Placebo-Controlled, Multicenter, Phase 3 Studies Included in the Pooled Analysis of Bempedoic Acid Efficacy

**eTable 2.** Baseline Statin Intensity Categories (Daily Dose)

**eFigure 1.** Patients Included in the Pooled Analysis by Study and Treatment Group

**eFigure 2.** Absolute Change in Low-Density Lipoprotein Cholesterol (LDL-C) at Week 12

**eFigure 3.** On-Treatment Analysis of Low-Density Lipoprotein Cholesterol (LDL-C) Over Time for Patients in the ASCVD/HeFH on Statins Pool

**eFigure 4.** Percentage Changes in Secondary Efficacy Measures From Baseline to Week 12 Associated with Bempedoic Acid Administration  
ASCVD indicates atherosclerotic cardiovascular disease; HeFH, heterozygous familial hypercholesterolemia; and LS, least-squares.

### eReferences

This supplementary material has been provided by the authors to give readers additional information about their work.

**eTable 1. Randomized, Double-blind, Parallel-Group, Placebo-Controlled, Multicenter, Phase 3 Studies Included in the Pooled Analysis of Bempedoic Acid Efficacy**

| Study                          | Duration | Population                                                                                                                       | Results at 12 Weeks                                                                                                                                                                                                                    |
|--------------------------------|----------|----------------------------------------------------------------------------------------------------------------------------------|----------------------------------------------------------------------------------------------------------------------------------------------------------------------------------------------------------------------------------------|
| CLEAR Wisdom <sup>1</sup>      | 52 weeks | Patients with ASCVD and/or HeFH and LDL-C $\geq$ 70 mg/dL while receiving maximally tolerated statin (with or without other LLT) | Bempedoic acid added to maximally tolerated statin (with or without other LLT) reduced LDL-C by 17.4% (95% CI, -21.0, -13.9) more than placebo ( $P < .001$ )                                                                          |
| CLEAR Harmony <sup>2</sup>     | 52 weeks | Patients with hypercholesterolemia and a history of statin intolerance who required additional LDL-C lowering                    | Bempedoic acid added to different intensities of background statin treatment (low, moderate, or high) with or without additional LLT reduced LDL-C from baseline (difference vs placebo, -18.1% [95% CI, -20.0%, -16.1%]; $P < .001$ ) |
| CLEAR Tranquility <sup>3</sup> | 12 weeks | Patients with hypercholesterolemia and a history of statin intolerance who required additional LDL-C lowering                    | Bempedoic acid added to stable LLT, including ezetimibe, reduces LDL-C up to 28.5% (95% CI, -34.4, -22.5) more than placebo ( $P < .001$ )                                                                                             |
| CLEAR Serenity <sup>4</sup>    | 24 weeks | Patients with hypercholesterolemia and a history of statin intolerance who required additional LDL-C lowering                    | Treatment with bempedoic acid reduced LDL-C 21.4% (95% CI, -25.1, -17.7) more than placebo ( $P < .001$ )                                                                                                                              |

Abbreviations: ASCVD, atherosclerotic cardiovascular disease; CI, confidence interval; HeFH, heterozygous familial hypercholesterolemia; LDL-C, low-density lipoprotein cholesterol; and LLT, lipid lowering therapy.

**eTable 2. Baseline Statin Intensity Categories (Daily Dose)**

| <b>Study</b>                                                         | <b>High Intensity</b>                                                                                                                                                       | <b>Moderate Intensity</b>                                                                                                                                                                                 | <b>Low Intensity<sup>a</sup></b>                                                                                     |
|----------------------------------------------------------------------|-----------------------------------------------------------------------------------------------------------------------------------------------------------------------------|-----------------------------------------------------------------------------------------------------------------------------------------------------------------------------------------------------------|----------------------------------------------------------------------------------------------------------------------|
| CLEAR Wisdom <sup>1</sup><br>and CLEAR<br>Harmony <sup>2</sup>       | Atorvastatin (40–80 mg)<br>Rosuvastatin (20–40 mg)                                                                                                                          | Atorvastatin (10–20 mg)<br>Rosuvastatin (5–10 mg)<br>Simvastatin (20–40 mg)<br>Pravastatin (40–80 mg)<br>Lovastatin (40 mg)<br>Fluvastatin XL (80 mg)<br>Fluvastatin (40 mg BID)<br>Pitavastatin (2–4 mg) | Simvastatin (10 mg)<br>Pravastatin (10–20 mg)<br>Lovastatin (20 mg)<br>Fluvastatin (20–40 mg)<br>Pitavastatin (1 mg) |
|                                                                      | <b>Very Low Dose</b>                                                                                                                                                        | <b>Low Dose</b>                                                                                                                                                                                           |                                                                                                                      |
| CLEAR Tranquility <sup>3</sup><br>and CLEAR<br>Serenity <sup>4</sup> | Rosuvastatin (< 5 mg)<br>Atorvastatin (< 10 mg)<br>Simvastatin (< 10 mg)<br>Lovastatin (< 20 mg)<br>Pravastatin (< 40 mg)<br>Fluvastatin (< 40 mg)<br>Pitavastatin (< 2 mg) | Rosuvastatin (5 mg)<br>Atorvastatin (10 mg)<br>Simvastatin (10 mg)<br>Lovastatin (20 mg)<br>Pravastatin (40 mg)<br>Fluvastatin (40 mg)<br>Pitavastatin (2 mg)                                             |                                                                                                                      |

<sup>a</sup>Also includes alternate regimens (ie, every other day or a prespecified number of times/week). BID = twice daily.

**eFigure 1. Patients Included in the Pooled Analysis by Study and Treatment Group**

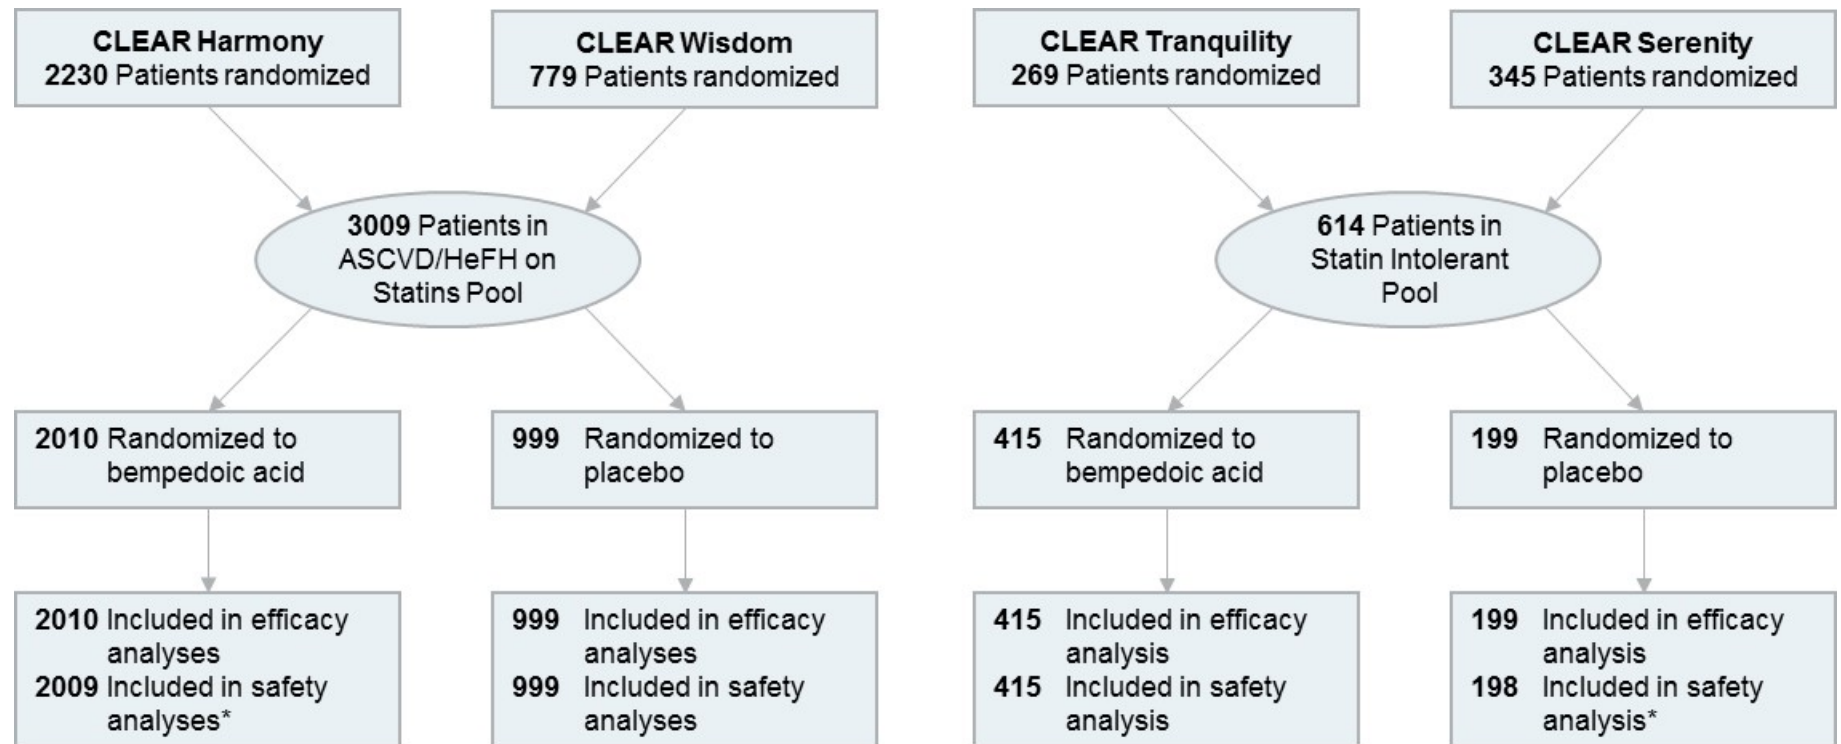

\*Two patients (1 patient in the bempedoic acid treatment group and 1 patient in the placebo treatment group) did not receive any dose of study drug and were excluded from the safety analysis population. Abbreviations: ASCVD, atherosclerotic cardiovascular disease; HeFH, heterozygous familial hypercholesterolemia.

eFigure 2. Absolute Change in Low-Density Lipoprotein Cholesterol at Week 12

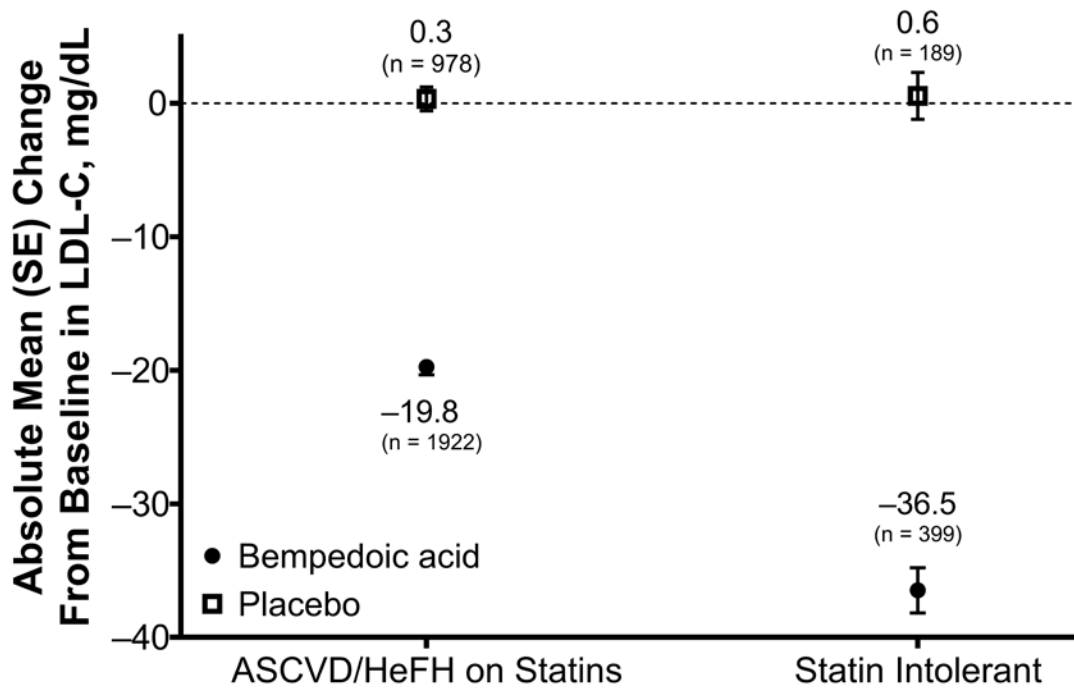

Abbreviations: ASCVD, atherosclerotic cardiovascular disease; HeFH, heterozygous familial hypercholesterolemia; SD, standard deviation.

**eFigure 3. On-Treatment Analysis of Low-Density Lipoprotein Cholesterol (LDL-C) Over Time for Patients in the ASCVD/HeFH on Statins Pool**

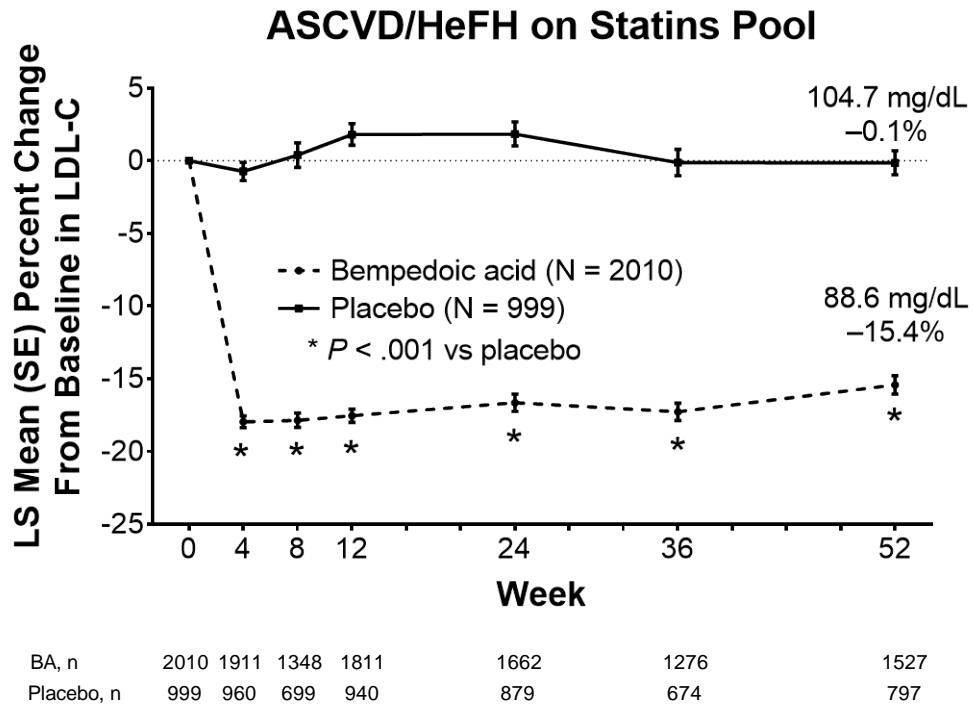

Data are LS means  $\pm$  SEs. The on-treatment analysis included only those patients who were still receiving assigned study treatment within 7 days prior to LDL-C measurement. The difference between bempedoic acid and placebo was nominally significant at each time point ( $P < .001$ ). Abbreviations: ASCVD, atherosclerotic cardiovascular disease; HeFH, heterozygous familial hypercholesterolemia; LS, least squares; SE, standard error.

**eFigure 4.** Percentage Changes in Secondary Efficacy Measures From Baseline to Week 12 Associated with Bempedoic Acid Administration

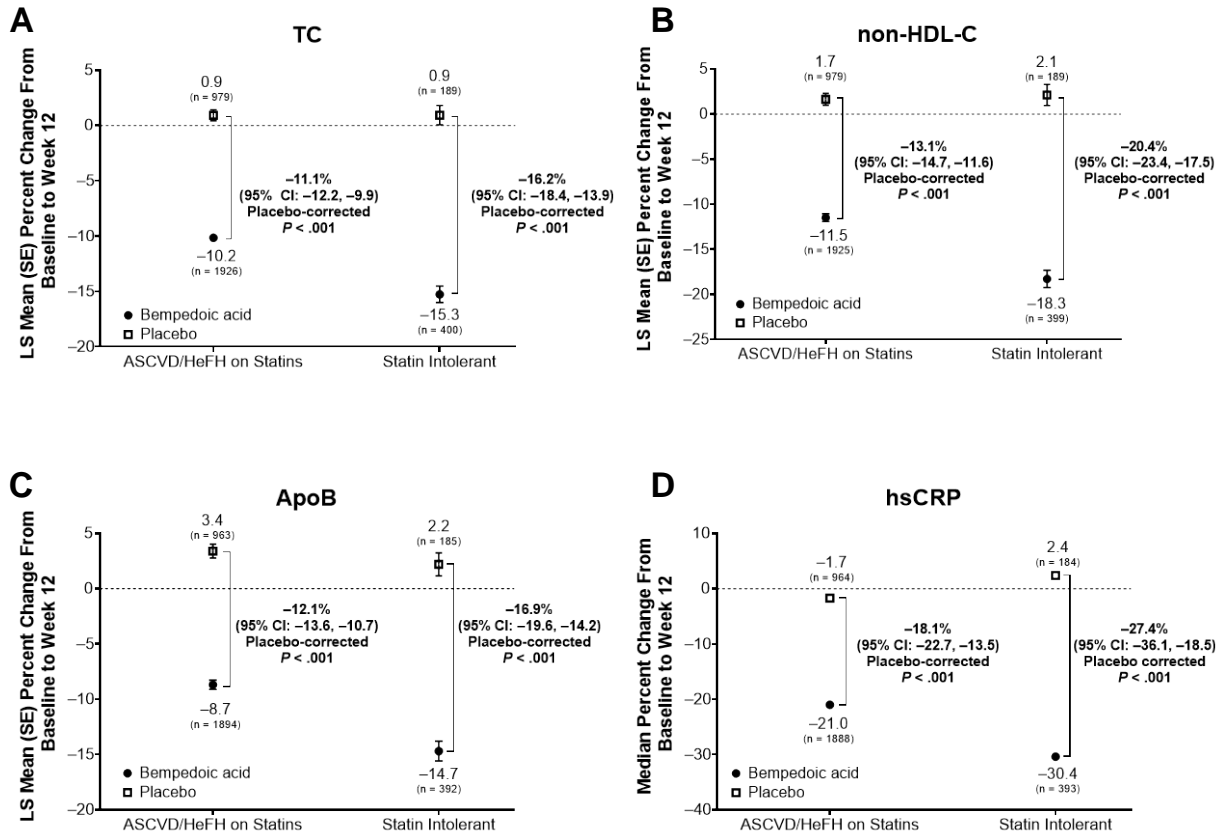

ASCVD indicates atherosclerotic cardiovascular disease; HeFH, heterozygous familial hypercholesterolemia; and LS, least-squares.

## eReferences

1. Goldberg AC, Leiter LA, Stroes ESG, et al. Effect of bempedoic acid vs placebo added to maximally tolerated statins on low-density lipoprotein cholesterol in patients at high risk for cardiovascular disease: The CLEAR Wisdom randomized clinical trial. *JAMA*. 2019;322:1780-1788. doi:10.1001/jama.2019.16585.
2. Ray KK, Bays HE, Catapano AL, et al; for the CLEAR Harmony Trial. Safety and efficacy of bempedoic acid to reduce LDL cholesterol. *N Engl J Med*. 2019;380:1022-1032.10.1056/NEJMoa1803917.
3. Ballantyne CM, Banach M, Mancini GBJ, et al. Efficacy and safety of bempedoic acid added to ezetimibe in statin-intolerant patients with hypercholesterolemia: a randomized, placebo-controlled study. *Atherosclerosis*. 2018;277:195-203.10.1016/j.atherosclerosis.2018.06.002.
4. Laufs U, Banach M, Mancini GBJ, et al. Efficacy and safety of bempedoic acid in patients with hypercholesterolemia and statin intolerance. *JAHA*. 2019;8:e011662.10.1161/JAHA.118.011662.
